# Supplementary material for: Lamp2 inhibits epithelial-mesenchymal transition by suppressing Snail expression in HCC
Source: PubMed Central journal article supplement (PMC6084387; doi:10.18632/oncotarget.25367), 2018-07-13
Supplement: oncotarget-09-30240-s001.pdf [file oncotarget-09-30240-s001.pdf]

## Lamp2 inhibits epithelial-mesenchymal transition by suppressing Snail expression in HCC

### SUPPLEMENTARY MATERIALS



**Supplementary Figure 1:** (A and B) The low Lamp2 subgroup had a significantly shorter RFS and OS than the high Lamp2 subgroup in the tissue microarray cohort with a normal serum AFP level ( $< 20 \mu\text{g/L}$ ). (C and D) The low Lamp2 subgroup had a significantly shorter RFS and OS than the high Lamp2 subgroup in the tissue microarray cohort with small hepatocellular carcinoma (SHCC, the diameter of HCC  $\leq 5$  cm). Statistical significance was assessed by two-sided log-rank tests.



Fig-S2

**Supplementary Figure 2:** (A–B) qRT-PCR and Western blot analysis were performed to assess the expression of Lamp2 in several HCC cells. (C–E) qRT-PCR and Western blot analysis were performed to assess the knockdown and overexpression of Lamp2 in Huh7 and HepG2 cells.

**Supplementary Table 1: Univariate analysis for RFS and OS**

| Variable                                          | RFS          |             |         | OS           |             |         |
|---------------------------------------------------|--------------|-------------|---------|--------------|-------------|---------|
|                                                   | Hazard Ratio | 95% CI      | P value | Hazard Ratio | 95% CI      | P value |
| Age, years, > 55 vs. ≤ 55                         | 0.764        | 0.590–0.990 | 0.042   | 0.758        | 0.566–1.015 | 0.063   |
| Sex, male vs. female                              | 1.068        | 0.695–1.642 | 0.674   | 1.113        | 0.685–1.810 | 0.664   |
| HBsAg, positive vs. negative                      | 1.221        | 0.837–1.781 | 0.300   | 1.247        | 0.812–1.913 | 0.313   |
| Liver cirrhosis, present vs. absent               | 1.127        | 0.867–1.467 | 0.371   | 1.401        | 1.036–1.895 | 0.029   |
| AFP, µg/L                                         | 1.755        | 1.359–2.265 | < 0.001 | 1.996        | 1.497–2.661 | < 0.001 |
| Edmondson-Steiner classification, III–IV vs. I–II | 1.578        | 0.930–2.677 | 0.091   | 1.630        | 1.025–2.592 | 0.039   |
| Microvascular invasion, present vs. absent        | 1.665        | 1.287–2.154 | < 0.001 | 2.196        | 1.647–2.927 | < 0.001 |
| Tumor diameter, cm, > 5 vs. ≤ 5                   | 2.540        | 1.937–3.331 | < 0.001 | 1.573        | 1.174–2.109 | 0.002   |
| Tumor number, multiple vs. solitary               | 3.122        | 2.365–4.121 | < 0.001 | 2.451        | 1.816–3.307 | < 0.001 |
| Capsule formation, incomplete vs. complete        | 1.059        | 0.821–1.367 | 0.658   | 1.123        | 0.843–1.495 | 0.428   |
| Lamp2 expression, low vs. high                    | 1.831        | 1.417–2.366 | < 0.001 | 2.181        | 1.632–2.916 | < 0.001 |

Abbreviation: HBsAg, hepatitis B surface antigen; AFP, alpha fetoprotein.

**Supplementary Table 2: Sequence of primers for real-time PCR**

| Gene Name  | Forward primer (5' → 3')  | Reverse primer (5' → 3') |
|------------|---------------------------|--------------------------|
| Lamp2      | GTGAGTTGTATTGGGGTTGATGTTA | CAATGATACTTGCTGCTGGCTAC  |
| β-actin    | CTACCTCATGAAGATCCTCACCGA  | TTTCCTTAATGTCACGCACGATT  |
| E-cadherin | CTTCCATGACAGACCCCTTAA     | GAACGCATTGCCACATACT      |
| ZO-1       | GGACTCGTATCTGTATGTGGG     | AGAGCCTAATCTGACCTATGAAC  |
| N-cadherin | GTCCTGGTCTTCTTCTCCTCC     | CCTGCTTATCCTTGTGCTGAT    |
| Vimentin   | TCGTGATGCTGAGAAGTTTCG     | TCTGGATTCACTCCCTCTGGT    |
| TGF-β      | AGAGCAACACGGGTTTCAGGTA    | TGGAAACCCACAACGAAATCT    |
